# Supplementary material for: Diffusion Restriction Comparison between Gleason 4 Fused Glands and Cribriform Glands within Patient Using Whole-Mount Prostate Pathology as Ground Truth
Source: MDPI journal article supplement (doi:10.3390/tomography8020053), 2022-03-02
Supplement: s1 [file s1]

## Supplement

**Table S1.** Two-Layer LMM considering the slides nested within patients as the random effect. Estimate and 95% Confidence Intervals given in units of mm<sup>2</sup>/s.

|            |                             |          |                  |         |          |
|------------|-----------------------------|----------|------------------|---------|----------|
| ADC1000    | Fixed effect                | Estimate | 95% CI           | t-value | Pr(> t ) |
|            | Intercept                   | 1.311    | (1.203, 1.419)   | 24.288  | <0.0001  |
|            | Cribriiform vs Fused Glands | -0.062   | (-0.069, -0.055) | -18.013 | <0.0001  |
|            | Random effect               | Std Dev  | 95% CI           |         |          |
|            | Subject:Slide (Intercept)   | 0.247    | (0.213, 0.290)   |         |          |
|            | Subject (Intercept)         | 0.222    | (0.144, 0.321)   |         |          |
|            | Residual                    | 0.287    | (0.286, 0.288)   |         |          |
| ACD2000    | Fixed effect                | Estimate | 95% CI           | t-value | Pr(> t ) |
|            | Intercept                   | 0.959    | (0.878, 1.041)   | 23.58   | <0.0001  |
|            | Cribriiform vs Fused Glands | -0.033   | (-0.038, -0.029) | -14.621 | <0.0001  |
|            | Random effect               | Std Dev  | 95% CI           |         |          |
|            | Subject:Slide (Intercept)   | 0.170    | (0.147, 0.200)   |         |          |
|            | Subject (Intercept)         | 0.172    | (0.115, 0.245)   |         |          |
|            | Residual                    | 0.189    | (0.188, 0.190)   |         |          |
| Lumen      | Fixed effect                | Estimate | 95% CI           | t-value | Pr(> t ) |
|            | Intercept                   | 0.0471   | (0.039, 0.056)   | 10.851  | <0.0001  |
|            | Cribriiform vs Fused Glands | 0.0247   | (0.022, 0.028)   | 15.456  | <0.0001  |
|            | Random effect               | Std Dev  | 95% CI           |         |          |
|            | Subject:Slide (Intercept)   | 0.0426   | (0.0370, 0.0490) |         |          |
|            | Subject (Intercept)         | 0        | (0, 0.0170)      |         |          |
|            | Residual                    | 0.135    | (0.134, 0.135)   |         |          |
| Stroma     | Fixed effect                | Estimate | 95% CI           | t-value | Pr(> t ) |
|            | Intercept                   | 0.815    | (0.777, 0.851)   | 45.071  | <0.0001  |
|            | Cribriiform vs Fused Glands | 0.0697   | (0.064, 0.075)   | 24.470  | <0.0001  |
|            | Random effect               | Std Dev  | 95% CI           |         |          |
|            | Subject:Slide (Intercept)   | 0.170    | (0.146, 0.198)   |         |          |
|            | Subject (Intercept)         | 0.0304   | (0, 0.090)       |         |          |
|            | Residual                    | 0.238    | (0.237, 0.239)   |         |          |
| Epithelium | Fixed effect                | Estimate | 95% CI           | t-value | Pr(> t ) |
|            | Intercept                   | 0.140    | (0.103, 0.179)   | 7.471   | <0.0001  |
|            | Cribriiform vs Fused Glands | -0.0941  | (-0.0990, -0.09) | -40.486 |          |
|            | Random effect               | Std Dev  | 95% CI           |         |          |
|            | Subject:Slide (Intercept)   | 0.163    | (0.140, 0.192)   |         |          |
|            | Subject (Intercept)         | 0.0429   | (0, 0.0980)      |         |          |
|            | Residual                    | 0.194    | (0.193, 0.195)   |         |          |
